# Supplementary material
Source: PubMed Central journal article supplement (PMC4403211)
Supplement: pnas.201503998SI.pdf [file pnas.201503998SI.pdf]

# Supporting Information

Wang et al. 10.1073/pnas.1503998112

## SI Materials and Methods

**Plant Materials and Growth Conditions.** *A. thaliana* materials used in this work include the wild-type ecotype Col-0, Landsberg *erecta* (*Ler*), and the following mutants or marker lines: *ins-1* (SALK\_138654), *ins-2* (GT\_5\_101747), *trp3-1* (1), *trp3-100* (2), *trp2-1* (3), *trp2-301* (4), *trp5-1* (5), *wei8-1* (6), *yuc4 yuc6* (*yuc4/6*) (7), *sur2* (8), *DR5:GUS* (9), and *DR5:GFP* (10). *Arabidopsis* seeds were surface-sterilized, vernalized at 4 °C for 2–4 d, and germinated on MS medium containing 1.0% (wt/vol) sucrose and 0.6% agar (type M, Sigma-Aldrich) at 21–23 °C in a 16-h light/8-h dark cycle at an intensity of 60–80  $\mu\text{E}\cdot\text{m}^{-2}\cdot\text{s}^{-1}$ . For morphological examination, 10-d-old seedlings were transferred to vermiculite saturated with 0.3 × B5 medium and grown under a 16-h light/8-h dark cycle at 21–23 °C as described previously (11). For root observation, seedlings were grown vertically on MS plates containing 2.0% (wt/vol) sucrose and 0.6% phytoagar or on MS plates supplemented with 50  $\mu\text{M}$  Trp for 5 d. The sequences of all of the primers used in this work were listed in Table S1.

**Plasmid Construction and Plant Transformation.** A 7.7-kb DNA fragment containing the 3-kb upstream sequence, entire *INS* coding region, and 3-kb downstream sequence was amplified by primers *INSpro-INS-F* and *INSpro-INS-R* with KpnI and SalI adaptors from the BAC clone T10P11. The amplified DNA fragment was inserted into the KpnI- and SalI-digested pCAMBIA1300 vector (CAMBIA) to generate the complementation construct *INS:INS*, which was transformed into the *ins-1 DR5:GUS* and *ins-1* plants, respectively, by the *Agrobacterium*-mediated floral dip method (12). The  $T_3$  homozygous progeny of *INS:INS/ins-1 DR5:GUS* seedlings were used for GUS signal observation, and the  $T_3$  homozygous plants of *INS:INS/ins-1* transgenic plants were collected for embryogenesis analysis and quantification of free IAA and Trp contents.

To construct the *35S:TSA* plasmid, a BamHI-KpnI fragment containing the *TSA* coding sequence (CDS) was amplified by primers *TSA-OE-F* and *TSA-OE-R* and then subcloned into the BamHI- and KpnI-digested pBin438 vector. To generate the *cTP-INS* fusion fragment, the *cTP* region of *TSA* was amplified by primers *G-cTP-F1* and *cTP-INS-R1*, and the *INS*-coding region was amplified by primers *cTP-INS-F2* and *G-INS-R2*. Then the PCR products were mixed and subjected to an amplification with primers *G-cTP-F1* and *G-INS-R2*. To construct the *35S: $\Delta$ cTP-TSA* and *35S:cTP-INS* plasmids, the  *$\Delta$ cTP-TSA1* fragment amplified from *Arabidopsis* cDNA by primers *G- $\Delta$ cTP-TSA-F* and *G-TSA-R* and the *cTP-INS* fusion fragment were cloned into the Gateway entry vector pDONR222 (Invitrogen) and subsequently transferred to the binary vector pB7WG2D (13).

To construct the *35S:INS-GFP*, *35S:TSA-GFP*, *35S:cTP-INS-GFP*, and *35S: $\Delta$ cTP-TSA-GFP* plasmids, four BamHI-SalI fragments containing *INS* CDS, *TSA* CDS, *cTP-INS*, and  *$\Delta$ cTP-TSA1* were amplified using primer pairs *INS-G-F* + *INS-G-R*, *TSA-OE-F* + *TSA-G-R*, *cTP-INS-F* + *cTP-INS-R*, and  *$\Delta$ cTP-TSA-F* +  *$\Delta$ cTP-TSA-R*, respectively, and then subcloned into BamHI- and SalI-digested pBI221-GFP vector. Recombinant plasmids were subsequently digested with BamHI and EcoRI, and the insertion fragments were subcloned into BamHI- and EcoRI-digested pBI121 vector.

To construct *INS:INS-GFP-GUS* and *TSA:TSA-GFP-GUS* plasmids, the *INSpro:INS* fragment was amplified from the BAC clone T10P11 using primers *G-INSpro-F* and *G-INS no GA-R*, and the *TSApro:TSA* fragment was amplified from *Arabidopsis* genomic DNA using primers *G-TSApro-F* and *G-TSA no GA-R*.

Then *INSpro:INS* and *TSApro:TSA* fragments were cloned into the Gateway entry vector pDONR222 (Invitrogen) and subsequently transferred to the binary vector pBGWFS7 (13).

**Gene Expression Analysis.** Total RNA was prepared using a TRIzol kit according to the user manual (Invitrogen) and treated with TUBRO DNase (Ambion) before use. First-strand cDNA was synthesized using the oligo(dT) primer with the SSIII first-strand synthesis system (Invitrogen). Real-time PCR experiments were performed using gene-specific primers in a total volume of 20  $\mu\text{L}$  with 1  $\mu\text{L}$  of diluted cDNA, 0.5  $\mu\text{M}$  gene-specific primers, and 10  $\mu\text{L}$  EvaGreen supermix (BioRad) on a CFX 96 real-time system (BioRad) according to the manufacturer's instructions. The *Arabidopsis Ubiquitin5 (UBQ5)* and *EF1a* genes were used as the internal controls.

**Hypocotyl Measurements.** Seedlings were grown on MS plates at 20 °C and 28 °C for 9 d in continuous light as previously described (14). Hypocotyl length was measured using ImageJ software ([rsbweb.nih.gov/ij/](http://rsbweb.nih.gov/ij/)).

**Histological and Microscopy Analyses.** Histochemical staining for GUS activities was performed as described (15). Briefly, whole seedlings or various tissues were immersed in the GUS staining solution, which contains 2 mM 5-bromo-4-chloro-3-inolyl- $\beta$ -D-glucuronic acid, 100 mM sodium phosphate (pH 7.2), 10 mM ethylene diamine tetraacetic acid, 0.5 mM potassium ferricyanide, 0.5 mM potassium ferrocyanide, and 0.1% Triton X-100. Plant materials were vacuumed briefly and incubated at 37 °C in dark from 30 min to overnight. The GUS stain solution was removed and replaced with 70% (vol/vol) ethanol to remove chlorophyll from the tissue. *Arabidopsis* roots were then cleared in the HCG solution (chloroacetaldehyde:water:glycerol = 8:3:1) for several minutes before observation. Finally, the GUS signals were observed under a stereomicroscope or microscope, and individual representative seedlings were photographed with a CCD camera.

To observe the subcellular localization of *INS-GFP*, *TSA-GFP*, *cTP-INS-GFP*, and  *$\Delta$ cTP-TSA-GFP*, leaves of the stable *35S:INS-GFP*, *35S:TSA-GFP*, *35S:cTP-INS-GFP*, and *35S: $\Delta$ cTP-TSA-GFP* transgenic plants were collected for protoplast preparation as described (16). The GFP signals and chlorophyll autofluorescence were examined under a confocal microscope (FluoView FV1000; Olympus) at an excitation wavelength of 488 and 647 nm, respectively.

To observe GFP signals in embryos, ovules were collected in 10% (vol/vol) glycerol solution, and embryos were squeezed out of the ovules by careful extrusion under a cover glass. The GFP signals were examined under a confocal microscope (FluoView FV1000; Olympus) at an excitation wavelength of 488 nm.

To study the development of embryos, siliques were dissected with hypodermic needles and cleared in Herr's solution containing lactic acid:chloral hydrate:phenol:clove oil:xylene (2:2:2:2:1, wt/wt) (17) and observed with a confocal microscope (FluoView 1000; Olympus).

**Free IAA Measurement in Seedlings and Aerial Parts.** Seedlings of 12-d-old Col-0, *ins-1*, *trp3-1*, *INS:INS/ins-1*, *35S:cTP-INS/trp3-1*, *INS:INS/trp3-1*, *trp2-1*, *ins-1 trp2-1*, *yuc4 yuc6* (*yuc4/6*), *ins-1 yuc4/6*, *Ler*, and *ins-2* grown on MS medium were collected and frozen in liquid nitrogen. In addition, aerial parts of 30-d-old Col-0, *ins-1*, *trp2-301*, *ins-1 trp2-301*, *trp2-1*, and *ins-1 trp2-1* plants were used for free IAA measurement. Five or six independent replicates were prepared. For each replicate, ~200 mg (fresh weight)

materials were homogenized under liquid nitrogen, weighted, and extracted at  $-20^{\circ}\text{C}$  for 24 h with 2 mL of cold methanol containing antioxidant and  $^2\text{H}_2$ -IAA (internal standard, CDN Isotopes). Purification was performed with Oasis MAX solid-phase extract cartridge (150 mg/6 cc; Waters). Measurement of free IAA was carried out using a UPLC-MS/MS system consisting of a UPLC system (ACQUITY UPLC; Waters) and a triple quadrupole tandem mass spectrometer (Quattro Premier XE; Waters) as previously described (18).

**Free IAA Measurement in Ovules.** Ovules in the fourth and fifth siliques of the *Arabidopsis* main stem were harvested from the funicle carefully with hypodermic needles and hybrid tweezers and collected in 2.0-mL safe-lock tubes with 200  $\mu\text{L}$  of cold methanol-containing antioxidant. The wild-type ovules, morphologically normal ovules of *ins-1* (*ins-1* normal), and *trp3-1* ovules were light green, whereas the abnormal ovules from the *ins-1* siliques (*ins-1* abnormal) and from the *ins-1 trp3-1*<sup>+/-</sup> siliques (*ins-1 trp3-1*) were white. Five independent replicates were prepared. Each replicate contained about 80 ovules and 0.2 ng  $^{13}\text{C}_6$ -IAA (internal standard, Cambridge Isotope Laboratories). Then samples were homogenized by ball mill (MM 400; Retsch GmbH) at a frequency of 28 Hz for 1 min using 3-mm tungsten carbide beads. After extraction at  $-20^{\circ}\text{C}$  for 12 h, the samples were centrifuged at  $16,000 \times g$  for 15 min, and the supernatants were collected and dried with nitrogen. The residues were derivatized with bromocholine bromide (BETA, TCI) as previously described (19). After evaporation of the reaction mixture, the residues were reconstituted and subjected to solid-phase extraction with Bond Elut CBA cartridges (1 mL, Agilent) for further enrichment. After evaporation, the residues were dissolved with 300  $\mu\text{L}$  of 10% (vol/vol) acetonitrile containing 0.1% formic acid. The IAA derivative was analyzed using the UPLC-MS/MS system consisting of a UPLC (ACQUITY UPLC) and a triple quadrupole tandem mass spectrometer (QTRAP 5500; AB SCIEX) under positive ion mode. Chromatographic separation was performed on an ACQUITY UPLC BEH  $\text{C}_{18}$  column ( $100 \times 2.1$  mm, 1.7  $\mu\text{m}$ ; Waters) with the column temperature set at  $25^{\circ}\text{C}$ , and the flow rate was 0.4 mL/min. The linear gradient runs from 88 to 66% (vol/vol) A (solvent A, 0.1% formic acid aqueous; solvent B, acetonitrile) in 7 min and from 66–8% (vol/vol) A in the next 1 min and is re-equilibrated with the initial condition for 3 min. The optimized mass spectrometer parameters were set as follows: curtain gas 20 psi, collision gas 6 psi, ion spray voltage 5,450 V, temperature  $600^{\circ}\text{C}$ . The declustering potential (93 V) and collision energy (42 V) were applied. Multiple reaction monitoring (MRM) mode was used for quantification and the selected MRM transitions were  $261.0 > 130.0$  for IAA derivative and  $267.0 > 136.0$  for  $^{13}\text{C}_6$ -IAA derivative, respectively.

**$^{13}\text{C}_6$ -IAA Measurement in Seedlings.** Five independent replicates were collected for  $^{13}\text{C}_6$ -IAA quantification. For each replicate,  $\sim 400$  mg (fresh weight) whole seedlings were homogenized under liquid nitrogen, weighted, and extracted for 24 h with 3 mL of cold methanol-containing antioxidant and 2.5 ng  $^2\text{H}_2$ -IAA (internal standard, CDN Isotopes). Endogenous  $^{13}\text{C}_6$ -IAA produced from  $^{13}\text{C}_6$ -anthranilic acid was measured similarly to that previously described (18) with some changes under UPLC-MS/MS conditions. The UPLC-MS/MS system consisted of a UPLC (ACQUITY UPLC) and a tandem mass spectrometer (QTRAP 5500). The chromatographic separation was achieved on an ACQUITY UPLC BEH  $\text{C}_{18}$  column ( $50 \times 2.1$  mm, 1.7  $\mu\text{m}$ ; Waters) with the column temperature at  $30^{\circ}\text{C}$  and a flow rate of 0.2 mL/min. The linear gradient runs from 90 to 60% (vol/vol) A (solvent A, 0.05% acetic acid aqueous; solvent B, methanol) in 4 min, 60–35% (vol/vol) A in the next 4 min, 35–2% (vol/vol) A in the following 1 min and is

re-equilibrated with the initial condition for 2 min. The optimized mass spectrometer parameters were set as follows: curtain gas at 40 psi, collision gas at 6 psi, ion spray voltage at  $-4,300$  V, and temperature at  $550^{\circ}\text{C}$ . The declustering potential ( $-85$  V) and collision energy ( $-13$  V) were applied. MRM mode was used for quantification and the selected MRM transitions were  $180.1 > 136.1$  for  $^{13}\text{C}_6$ -IAA and  $176.1 > 132.0$  for  $^2\text{H}_2$ -IAA.

**Endogenous Trp Measurement.** Seedlings of 7-d-old Col-0, *ins-1*, *trp3-1*, *trp2-1*, *35S:TSA/trp3-1*, *35S:cTP-INS/trp3-1*, *INS:INS/ins-1*, and *trp5-1* grown on MS medium were collected for Trp measurement. Frozen seedling samples were homogenized under liquid nitrogen. The fine powder of lyophilized tissues (6.0 mg) was transferred into a 4-mL glass vial. Then 1.5 mL of chloroform was added to the dry tissues. The sample was thoroughly vortexed and incubated for 45 min at  $37^{\circ}\text{C}$ . After cooling down to room temperature, 1.5 mL of HPLC-grade water containing 3  $\mu\text{g}$   $^2\text{H}_5$ -Trp (internal standard, Sigma-Aldrich) was added to the chloroform. Then the sample was vortexed, incubated for 45 min at  $37^{\circ}\text{C}$ , and centrifuged at  $3,000 \times g$  for 30 min to separate the phases. Then 1.0 mL of aqueous phase was transferred into a 1.5-mL tube and lyophilized to dry. The dry residue was resuspended into 50  $\mu\text{L}$  of pyridine containing 15.0 mg/mL methoxyamine-HCl and incubated for 1 h at  $50^{\circ}\text{C}$  after a brief sonication. Metabolites were then directly derivatized by mixing 50  $\mu\text{L}$  of *N*-methyl-*N*-(trimethylsilyl) trifluoroacetamide (MSTFA) with 1% trimethylchlorosilane (TMCS) (MSTFA + 1% TMCS, Fluka, 69478) for 1 h at  $50^{\circ}\text{C}$ . The clear supernatant was transferred into a glass insert after centrifugation at  $20,000 \times g$  for 10 min, and 1  $\mu\text{L}$  of supernatant was loaded on a gas chromatography-tandem mass spectrometry (GC-MS) system (Trace DSQ II; Thermo Fisher company) equipped with a 30-M DB 5MS column for Trp measurement. The oven temperature program was initially set at  $150^{\circ}\text{C}$  for 1 min and then ramped to  $240^{\circ}\text{C}$  at  $20^{\circ}\text{C}/\text{min}$ , to  $260^{\circ}\text{C}$  at  $10^{\circ}\text{C}/\text{min}$ , and to  $300^{\circ}\text{C}$  at  $20^{\circ}\text{C}/\text{min}$  and held for 5 min. The signal was collected using the SIM mode. The intensity of *m/z* 202 and 207, corresponding to Trp and  $^2\text{H}_5$ -Trp (retention time 19.59 min), respectively, was used for endogenous Trp calculation.

**Genetic Analysis.** Double and triple mutants were generated from the crosses of relevant homozygous single or double mutants and identified from the  $F_2$  progenies. Genotyping of the *ins-1*, *ins-2*, *wei8-1*, *sur2*, *yuc4*, *yuc6*, *trp3-1*, *trp3-100*, *trp2-1*, *trp2-301*, and *trp5-1* mutants was performed by PCR using the primers in Table S1. In detail, the PCR products of the wild type and *trp3-1* amplified by primers *trp3-1-F* and *trp3-1-R* were digested with BslI. The PCR products of the wild type and *trp3-100* amplified by primers *trp3-100-F* and *trp3-100-R* were digested with FokI. The PCR products of the wild type and *trp2-1* amplified by primers *trp2-1-F* and *trp2-1-R* were digested with BseRI. The PCR products of the wild-type and *trp2-301* amplified by primers of *trp2-1-F* and *trp2-1-R* were digested with BglII. The PCR products of the wild-type and *trp5-1* amplified by primers of *trp5-1-F* and *trp5-1-R* were digested with PstI. The *ins-1* mutant was genotyped using primer pairs 654RP + LBb1 and 326RP + 326LP. The *ins-2* mutant was genotyped using primer pairs 537G03RP + Ds5-4 and 537G03LP + 537G03RP. The *wei8-1* mutant was genotyped using primer pairs 70560R1 + DWLB1 and 70560F8 + 70560R1. The *sur2* mutant was genotyped using primer pairs 028573RP + LBb1 and 028573LP + 028573RP. The *yuc4* mutant was genotyped using primer pairs YUC4-R + SMP32 and YUC4-F + YUC4-R. The *yuc6* mutant was genotyped using primer pairs YUC6-R + LBb1 and YUC6-F + YUC6-R.

1. Last RL, Fink GR (1988) Tryptophan-requiring mutants of the plant *Arabidopsis thaliana*. *Science* 240(4850):305–310.

2. Radwanski ER, Barczak AJ, Last RL (1996) Characterization of tryptophan synthase alpha subunit mutants of *Arabidopsis thaliana*. *Mol Gen Genet* 253(3):353–361.



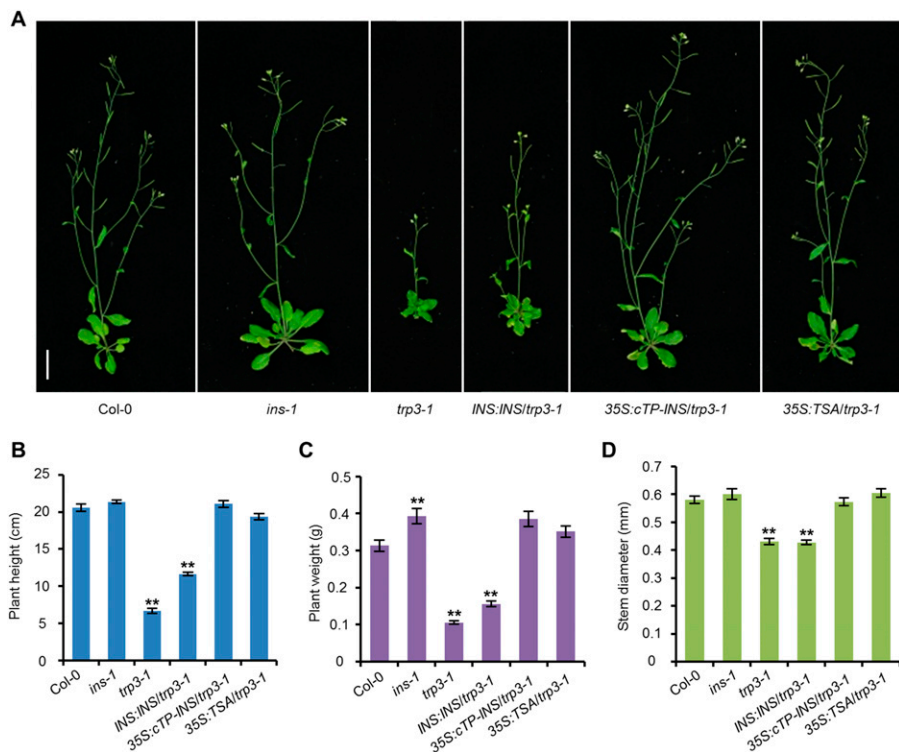

**Fig. 52.** Morphological comparison among wild-type (Col-0), *ins-1*, *trp3-1*, *INS:INS/trp3-1*, *35S:cTP-INS/trp3-1*, and *35S:TSA/trp3-1* plants. (A) Phenotypes of 40-d-old plants. (Scale bar, 2 cm.) (B–D) Quantitative analyses of plant height (B), plant fresh weight (C), and stem diameter (D) in 40-d-old plants. Data are represented as mean  $\pm$  SEM; \*\* $P < 0.01$  by Student's *t* test;  $n = 20$ .

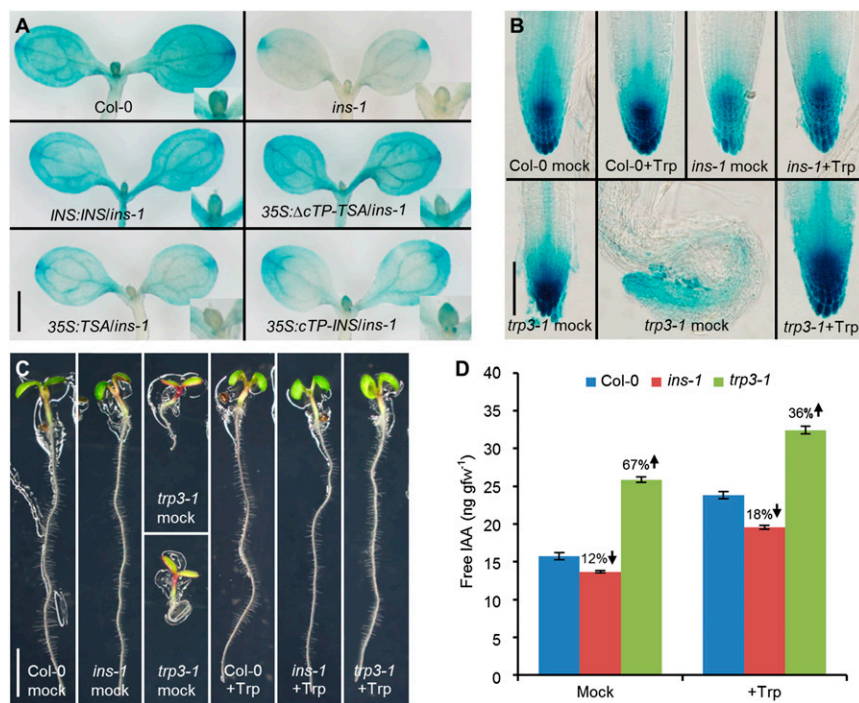

**Fig. 53.** Observations of *DR5* activities and effects of Trp treatment on wild-type, *ins-1*, and *trp3-1* seedlings. (A) The *DR5* activities visualized by GUS signals in 5-d-old wild-type (Col-0), *ins-1*, *INS:INS/ins-1*, *35S: $\Delta$ CP-TSA/ins-1*, *35S:TSA/ins-1*, and *35S:cTP-INS/ins-1* seedlings. (Insets) Enlarged shoot tips. Overexpression of *INS* and  $\Delta$ CP-TSA rescued the *DR5* activity of *ins-1*. (B and C) Expression patterns of *DR5:GUS* reporters (B) and morphologies (C) of 5-d-old wild-type (Col-0), *ins-1*, and *trp3-1* seedlings grown with or without 50  $\mu$ M Trp supplement. The *trp3-1* seedlings displayed short and curved roots with disordered expression patterns of *DR5:GUS*. (D) Free IAA contents in 12-d-old Col-0, *ins-1*, and *trp3-1* seedlings grown with or without 50  $\mu$ M Trp supplement.  $\text{gfw}^{-1}$ , per gram fresh weight. Data are represented as mean  $\pm$  SEM;  $n = 5$ . (Scale bars, 1 mm in A, 0.1 mm in B, and 0.2 cm in C.)

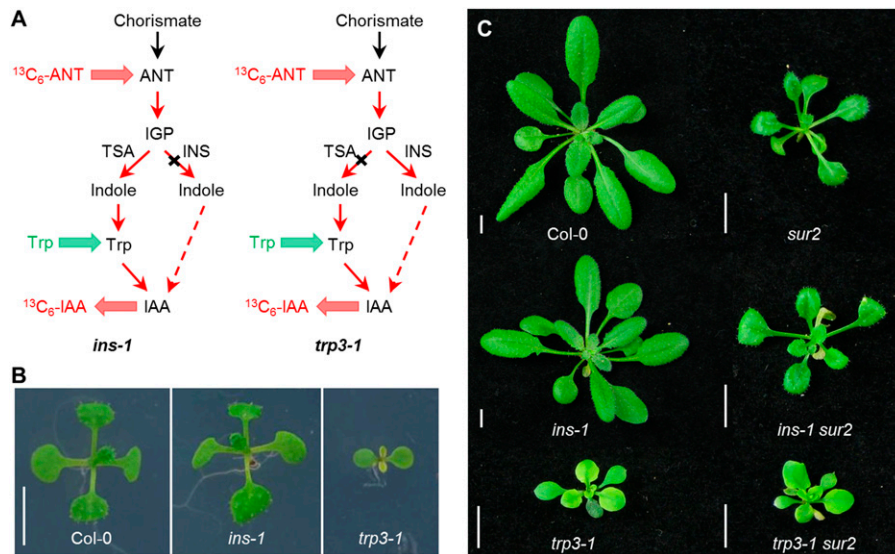

**Fig. 54.** Plant materials of  $^{13}\text{C}_6$ -anthranilic acid feeding experiment and phenotypic analysis of the *ins-1 sur2* and *trp3-1 sur2* double mutants. (A) Schematic diagrams of  $^{13}\text{C}_6$ -anthranilic acid ( $^{13}\text{C}_6$ -ANT) feeding experiment. The 11-d-old wild-type (*Col-0*), *ins-1*, and *trp3-1* seedlings were transferred to liquid MS media containing  $64\ \mu\text{M}$   $^{13}\text{C}_6$ -ANT and cultured for 24 h at  $28\ ^\circ\text{C}$ . In a parallel test, the MS medium contained  $64\ \mu\text{M}$   $^{13}\text{C}_6$ -ANT and  $100\ \mu\text{M}$  unlabeled Trp, which should increase the Trp pool size and decrease the biosynthesis of  $^{13}\text{C}_6$ -IAA only through the Trp-dependent pathway. (B) Morphologies of 11-d-old *Col-0*, *ins-1*, and *trp3-1* seedlings used for  $^{13}\text{C}_6$ -ANT feeding experiment. The *trp3-1* mutant formed small and yellow true leaves. (C) Phenotypes of 30-d-old wild-type (*Col-0*), *ins-1*, *sur2*, *ins-1 sur2*, *trp3-1*, and *trp3-1 sur2* plants. The phenotypes of *sur2* were suppressed by *trp3-1*, but not by *ins-1*. (Scale bars, 0.5 cm in B and C.)





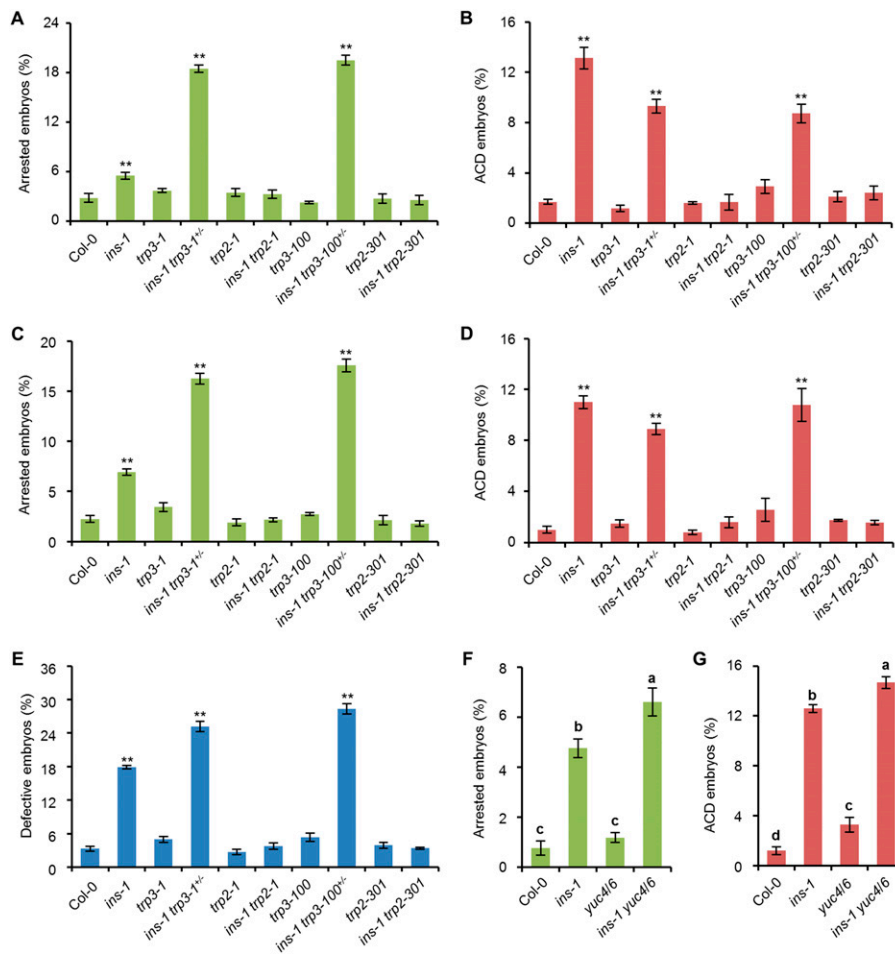

**Fig. S7.** Statistical analyses of embryonic defects in Col-0, *ins-1*, *trp3*, *ins-1 trp3<sup>+/-</sup>*, *trp2*, *ins-1 trp2*, *yuc4/6*, and *ins-1 yuc4/6* plants. (A and B) Percentages of arrested embryos (A) and ACD embryos (embryos with abnormal cell division planes) (B) in the wild-type (Col-0) and mutants at the globular stage. (C–E) Percentages of arrested embryos (C), ACD embryos (D), and defective embryos (E) in the wild-type (Col-0) and mutants at the heart stage. (A–E) Data are represented as mean ± SEM; \*\**P* < 0.01 by Student’s *t* test; *n* = 4, and each biological repeat contains about 250 embryos. (F and G) Percentages of arrested embryos (F) and ACD embryos (G) in wild type (Col-0), *ins-1*, *yuc4/6*, and *ins-1 yuc4/6* at the globular stage. Data are represented as mean ± SEM; different letters indicate significant difference by Tukey’s multiple comparison test (*P* < 0.05); *n* = 4, and each biological repeat contains about 250 embryos.

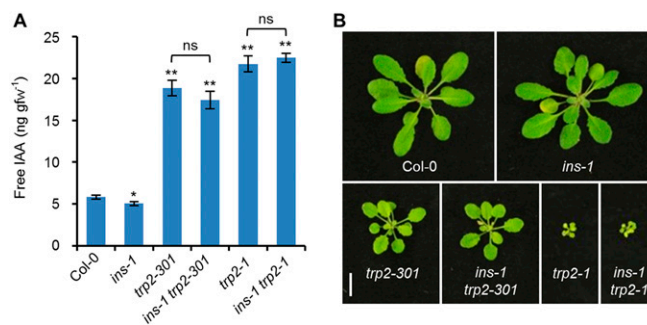

**Fig. S8.** Comparisons of IAA contents and morphologies among *ins-1*, *trp2*, and their double mutants. (A) Free IAA content in 30-d-old Col-0 (*n* = 5), *ins-1* (*n* = 6), *trp2-301* (*n* = 5), *ins-1 trp2-301* (*n* = 6), *trp2-1* (*n* = 6), and *ins-1 trp2-1* (*n* = 6) plants. gfw<sup>-1</sup>, per gram fresh weight; ns, no significant difference. Data are represented as mean ± SEM; \**P* < 0.05 and \*\**P* < 0.01 by Student’s *t* test. (B) Phenotypes of 4-wk-old wild-type (Col-0), *ins-1*, *trp2-301*, *ins-1 trp2-301*, *trp2-1*, and *ins-1 trp2-1* plants. (Scale bar, 1 cm.)





**Table S1. Primers used in this study**

| Primer name                             | Sequence                                                     |
|-----------------------------------------|--------------------------------------------------------------|
| <b>Primers for plasmid construction</b> |                                                              |
| INSpro-INS-F                            | 5'-aaggtaccATGTTGTTGTTAATAGTGGACCAATT-3'                     |
| INSpro-INS-R                            | 5'-aagtcgacTCCAATAGCTTCGACTTCGACTT-3'                        |
| TSA-OE-F                                | 5'-ggatcccATGGCGATTGCTTTCAAA-3'                              |
| TSA-OE-R                                | 5'-atggtaccTCAAAGAAGAGCAGATTTAAGA-3'                         |
| INS-G-F                                 | 5'-ggatcccATGGATCTTCTCAAGACTCCTT-3'                          |
| INS-G-R                                 | 5'-gtcgcacAGAGACAAGAGCAGACTTCAAAG-3'                         |
| TSA-G-R                                 | 5'-gtcgcacAAGAAGAGCAGATTTAAGAGACTTG-3'                       |
| cTP-INS-F                               | 5'-ttcggatcccATGGCGATTGCTTTCAAA-3'                           |
| cTP-INS-R                               | 5'-tttgcgcacAGAGACAAGAGCAGACTTC-3'                           |
| ΔcTP-TSA-F                              | 5'-ttaggatcccATGGCTTCTCTCCACC-3'                             |
| ΔcTP-TSA-R                              | 5'-tccgctgcacAAGAAGAGCAGATTTAAGAGA-3'                        |
| G-cTP-F1                                | 5'-GGGACAAGTTTGTACAAAAAGCAGGCTTAATGGCGATTGCTTTCAAA-3'        |
| cTP-INS-R1                              | 5'-GAGGAAGGAGTCTTGAGAAGATCCATGGGAGTGAATCTCTTGAAGAAAGCGATG-3' |
| cTP-INS-F2                              | 5'-CATCGCTTCTTTCAAGAGATTCACCTCCATGGATCTTCTCAAGACTCCTTCCTC-3' |
| G-INS-R2                                | 5'-GGGACCACCTTTGTACAAGAAAGCTGGGTATCAAGAGACAAGAGCAGA-3'       |
| G-ΔcTP-TSA-F                            | 5'-GGGACAAGTTTGTACAAAAAGCAGGCTTAATGGCTTCTCTCCTCCACC-3'       |
| G-TSA-R                                 | 5'-GGGACCACCTTTGTACAAGAAAGCTGGGTATCAAGAAGAGCAGATTT-3'        |
| G-INSpro-F                              | 5'-GGGACAAGTTTGTACAAAAAGCAGGCTTATACATACGGCTTCGACTC-3'        |
| G-INS no GA-R                           | 5'-GGGACCACCTTTGTACAAGAAAGCTGGGTAAAGAGACAAGAGCAGACT-3'       |
| G-TSApro-F                              | 5'-GGGACAAGTTTGTACAAAAAGCAGGCTTATCAGGTTTGTCA AATACC-3'       |
| G-TSA no GA-R                           | 5'-GGGACCACCTTTGTACAAGAAAGCTGGGTAAAAGAAGAGCAGATTTAA-3'       |
| <b>Primers for genotyping</b>           |                                                              |
| 654RP                                   | 5'-CCTTGCTCAGGTGATTCAGAC-3'                                  |
| 326LP                                   | 5'-CTGCGACGAGGAGTAGAGAAC-3'                                  |
| 326RP                                   | 5'-TTCGGAACCCGAAAATCTAC-3'                                   |
| 537G03LP                                | 5'-GACTCGCCCAAGATCTTAACC-3'                                  |
| 537G03RP                                | 5'-TGATCCATTAGCTGATGGTCC-3'                                  |
| YUC4-F                                  | 5'-TTGTCAAACCGAGGCGTACC-3'                                   |
| YUC4-R                                  | 5'-ACGACCATATGAGGCAGAGC-3'                                   |
| YUC6-F                                  | 5'-TCTGCAACTTCGGTGCTCAG-3'                                   |
| YUC6-R                                  | 5'-TTTAACGAGAACATCTTAAAGCGCTG-3'                             |
| 70560F8                                 | 5'-CATCAGAGAGACGGTGGTGAAC-3'                                 |
| 70560R1                                 | 5'-GCTTTTAAATGAGCTTCATGTTGG-3'                               |
| 028573LP                                | 5'-TTTCGTGGTTCTCTTTTCG-3'                                    |
| 028573RP                                | 5'-GTGGTATGGGCCATGACTTAC-3'                                  |
| <i>trp3-1-F</i>                         | 5'-ATGTGTGTTTGTGTCCTTGTCA-3'                                 |
| <i>trp3-1-R</i>                         | 5'-CTCCCATCCAGCTATCTGTTG-3'                                  |
| <i>trp3-100-F</i>                       | 5'-GAATACCTTGGCTGGTAGATTTCA-3'                               |
| <i>trp3-100-R</i>                       | 5'-TGTGGAACAACCTGCACCAA-3'                                   |
| <i>trp2-1-F</i>                         | 5'-CCTGGAGTCGGACCCGAGCA-3'                                   |
| <i>trp2-1-R</i>                         | 5'-TGTGGAACGTAAGTACCAGAGAG-3'                                |
| <i>trp5-1-F</i>                         | 5'-ACGTTTTGAGCGGCAACATCTGCA-3'                               |
| <i>trp5-1-R</i>                         | 5'-TGCTTTACTTTGGTGAGAATTTCTG-3'                              |
| LBb1                                    | 5'-GCGTGGACCGCTTGCTGCAACT-3'                                 |
| Ds5-4                                   | 5'-TACGATAACGGTCGGTACGG-3'                                   |
| SMP32                                   | 5'-TACGAATAAGAGCGTCCATTTTAGAGTGA-3'                          |
| DWLB1                                   | 5'-CATACTCATTGCTGATCCATGTAGATTTCC-3'                         |
| <b>Primers for qPCR</b>                 |                                                              |
| Q-UBQ5-F                                | 5'-GCTTCATCTCGTCCCTCCGTC-3'                                  |
| Q-UBQ5-R                                | 5'-AGAACAGCGAGCTTAACCTTCTTAT-3'                              |
| Q-EF1a-F                                | 5'-TGAGCAGCTCTTCTTGCTTTCA-3'                                 |
| Q-EF1a-R                                | 5'-GGTGGTGGCATCCATCTTGTTACA-3'                               |
| Q-INS-F                                 | 5'-ACTGCTCACAACACCCACAAC-3'                                  |
| Q-INS-R                                 | 5'-AACCCCTACTGAACTTACGAGATAGAT-3'                            |
| Q-TSA-F                                 | 5'-CATTTGCAGACAACATCTTTAGATT-3'                              |
| Q-TSA-R                                 | 5'-GTGTGGCTTGAGTCACAGTAACTTATT-3'                            |
